# Supplementary material for: A Conceptual framework for web-based Nepalese landslide information system
Source: Copernicus journal article supplement (doi:10.5194/nhess-2019-246), 2019-07-31
Supplement: Supplementary file [file nhess-2019-246-RC1-supplement.pdf]

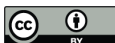

# 1 A Conceptual framework for web-based Nepalese landslide 2 information system

3 Sansar Raj Meena\*, Omid Ghorbanzadeh, Daniel Hölbling, Florian Albrecht, Thomas Blaschke

4 Department of Geoinformatics – Z\_GIS, University of Salzburg, Salzburg, 5020, Austria.

5 *Correspondence to:* Sansar Raj Meena ([sansarraj.meena@sbg.ac.at](mailto:sansarraj.meena@sbg.ac.at))

6 **Abstract.** Comprehensive and sustainable landslide management, including identification of landslide  
7 susceptible areas, requires a lot of organisations and people to collaborate efficiently. Often, landslide  
8 management efforts are made after major triggering events only, such as hazard mitigations ~~that~~ applied after the  
9 2015 Gorkha earthquake in Nepal. Next, to a lack of efficiency and continuity, there is also a lack of sharing of  
10 information and cooperation among stakeholders to cope with significant disaster events. There should be a  
11 system to allow easy update of landslide information after an event. For a variety of users of landslide  
12 information in Nepal, the availability and extraction of landslide data from the database are a vital requirement.  
13 In this study, we propose a concept for a web-based Nepalese landslide information system (NELIS) that  
14 provides users with a platform to share the location of landslide events for the further collaborations. The system  
15 will be defined as a web-based geographic information system (GIS) that supports responsible organisations to  
16 address and manage different user requirements of people working with landslides, thereby improving the  
17 current state of **landslide management** in Nepal. The overall aim of this research is to propose a conceptual  
18 design of NELIS  to show the current status of the cooperation between involved stakeholders. A system like  
19 NELIS could benefit stakeholders involved in data collection and landslide management in their efforts to report  
20 and provide landslide information. Moreover, such a system would allow for detailed and structured landslide  
21 documentation and consequently provide valuable information for susceptibility, hazard, and risk mapping. For  
22 the reporting of landslides directly to the system, a web portal is proposed. Stakeholders who can contribute to  
23 the reporting of landslides are mostly local communities and schools. Based on field investigations, literature  
24 reviews and user interviews, the practical structure of the landslide database and a conceptual design for the  
25 NELIS platform is proposed.

26 **Keywords:** Landslide database, hazard management, Landslide reporting, web-GIS.

## 27 1 Introduction

28 Landslides are one of the significant hazards that contributes to damages in the Himalayas. About 70 % of the  
29 total area of Nepal is mountainous terrain and prone to landslides (Kargel et al., 2016). Currently, several  
30 fatalities are caused by natural disasters in Nepal, and the death toll and destruction caused by landslides is  
31 rising (Meena et al., 2019a). Many landslides are triggered every year, mainly by heavy rainfall during the  
32 monsoon period. A lot of landslides gets reactivated and extended during the monsoon rains and lead to the  
33 destruction of infrastructure and human losses in the country (Pourghasemi and Rahmati, 2018). Due to a high  
 rate of population growth and unplanned dense building activities in susceptible areas, there is an **increase in**  
**damage**. Limited investments in slope protection and absence of spatial planning reveal the lack of intervention

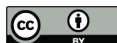

36 measures for reducing the landslides risk in Nepal. As a result, there is an increment of socio-economic  
37 problems in the hilly regions due to landslides, like loss of agricultural fields, deforestation, homeless  
38 population due to house damage. One of the most severe landslide events in recent years happened as a result of  
39 the Gorkha earthquake in April 2015 (Meena et al., 2019b). The earthquake had a magnitude of (M) 7.8 and  
40 caused landslides in an area of 10,000 km<sup>2</sup> located in Nepal and China, which led to damage of property and  
41 about 9000 human fatalities (Kargel et al., 2016; Tsou et al., 2018). As Nepal is located in the indo-Eurasian  
42 tectonic zone, it is prone to earthquakes (Meena et al., 2019c). Authorities in Nepal have to realise that their  
43 management of the landslide hazard and risk mitigation programs seem to be insufficient at both regional and  
44 national scale (Corominas et al., 2014; Rosser et al., 2017). There are some reasons for these insufficiencies. On  
45 the one hand, there is little collaboration happens between the authorities in charge of landslide management in  
46 Nepal so far. On the other hand, the information basis for landslides in Nepal is heterogeneous and dispersed  
47 over several organisations.

48 Moreover, each organisation follows its own rules to collect landslide information, i.e. no standard approach for  
49 data collection. Although efforts to tackle these problems exist among organisations in Nepal, they do not yet  
50 exploit opportunities provided by state-of-the-art technologies that are already in use in other countries or that  
51 are currently researched. Currently, there are some organisations like Tribhuvan University, International Centre  
52 for Integrated Mountain Development (ICIMOD) who have prepared pre-earthquake (Pokharel and Bhuj, 2015)  
53 and post-earthquake (Gurung and Maharjan, 2015) landslide inventories. However, access to these  
54 inventories is limited.

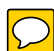

55 A comprehensive web-based landslide inventory can include some data illustration options such as aerial  
56 photographs, satellite data, monitoring data, and attribute information (Chen et al., 2016). Several landslide  
57 inventory preparation techniques can be considered: visual image interpretation (Cheng et al., 2018; Roback et  
58 al., 2018), semi-automated image analysis techniques (Hölbling et al., 2012), convolution neural networks and  
59 deep learning approaches (Ghorbanzadeh et al., 2019), UAV based mapping (Rossi et al., 2018; Suwal and  
60 Panday, 2015), use of tablet-based GIS (De Donatis and Bruciatelli, 2006; Knoop and van der Pluijm, 2006),  
61 and involvement of local communities as an alternative approach (Carr, 2014; Devkota et al., 2014; Jaiswal and  
62 van Westen, 2013). For every landslide, the accessible data should be transferred to one central database so that  
63 clients can retrieve, include, update or expel information in an automated way (Klose et al., 2014).

64 In the natural hazards domain, endeavours are made to generate landslide inventory databases following  
65 triggering events such as earthquakes (Meena et al., 2019a; Regmi et al., 2016), tsunamis (Aniel-Quiroga et al.,  
66 2015), heavy rainfalls (Kumar et al., 2008) and floods (Chendes et al., 2015). The international Emergency  
67 Events Database (EM-DAT) lists events in which at least ten persons died or at least 100 people were affected  
68 (CRED, 2018). A study carried out by (Van Den Eeckhaut and Hervás, 2012) in Europe shows the status of  
69 landslide databases and the value for attaining landslide susceptibility hazard and risk analysis (Westen et al.,  
70 2014). It indicates that a total of 25 European Union members maintain national landslide databases. In another  
71 effort, (Herrera et al., 2018) analysed the landslide databases from the European countries' geological surveys  
72 by concentrating on their interoperability and completeness. In general, geological surveys are most often  
73 responsible for creating landslide databases in their country; for example, the digital landslide database of  
74 France was developed by the French Geological Society already in 1994 (BRGM, 2018). Some countries like  
75 Italy have two landslides databases: The Inventory of the Landslide Phenomena in Italy (IFFI) (Lazzari et al.,



76 2018) and the AVI Project (Vulnerable Italian areas) (Guzzetti et al., 1994). In Great Britain, there is a national  
77 landslide database (Pennington et al., 2015) that is developed by the British Geological Survey. It has the point  
78 and polygon-based landslide information with attributes attached for each landslide and covers approximately  
79 17,000 records of landslides in Great Britain. Recent national landslide databases have been developed by, for  
80 example, China (Xu et al., 2015) and New Zealand (Rosser et al., 2017). In the USA, landslide inventory data is  
81 managed by the United States Geological Survey (USGS).  
82 Web-based landslide inventory databases provide vital baseline information about landslide areas, location,  
83 types, triggers, geometry, distribution and a broad scope of extra attributes (Guzzetti et al., 2012). Landslide  
84 **databases considered** important for various purposes, such as susceptibility analysis, hazard evaluation and risk  
85 assessment (Feizizadeh et al., 2014). Landslide inventory databases provide the base data for carrying out  
86 susceptibility analysis using multiple knowledge-based and data-driven models at various spatial levels from  
87 regional to national levels (Hölbling, 2017; Meena et al., 2019a).  
88 In our case study of Nepal, the situation is different as there are multiple agencies responsible for landslide  
89 management. Therefore, there is a need of a platform for collaboration between all involved organisations in  
90 landslide management. Such a platform will provide researchers and policymakers with an updatable database  
91 for preparing landslide zonation of the country and identifying most susceptible regions for quick response  
92 during  landslide hazards. At the local level, people are the best source of landslide information for updating of  
93 the database. However, currently, there are not enough efforts to involve local people in **landslide management**  
94 in Nepal. Considering this issue, there is an essential need for a comprehensive nodal agency for hosting such a  
95 platform at a national scale, while at the same time, different agencies and local people can be incorporated.  
96 A landslide information system is required that can incorporate information about different landslide  
97 characteristics and types (Meena et al., 2018). Availability and extraction of landslide data from the system for  
98 the public and all government agencies are essential aspects. For the reporting of landslides directly in the  
99 system, a web portal is needed that is connected to the internet and the central database (Meena et al., 2018).  
100 The development of the Nepalese landslide information system (NELIS) to report and arrange landslide data  
101 will facilitate better data sharing among stakeholders. Consequently, it can lead to improved reconstruction  
102 planning for minimising the impacts and consequences of landslides in Nepal, also there is a need for  
103 incorporating landslide hazard and risk in the planning process at the regional level.

## 104 2 Workflow

105 In this section, the workflow of the present study adopted for the development of NELIS is detailed. Our  
106 workflow consists of three main components of a) user requirements analysis of stakeholders, b) landslide  
107 reporting, and c) landslide database generation. There are two types of landslide reporting in the system,  
108 voluntary mapping and mandatory mapping from organisations working on landslide research. Also, users and  
109 providers of landslide data are identified based on a questionnaire survey and field visits. To determine the  
110 potential users and providers of landslide information, interviews and questionnaire survey were conducted  
111 during a field visit in July 2018. The objective was to identify aspects related to the development of a landslide  
112 database structure, for users and information providers. For example, we locally investigated whether  
113 preliminary users like schoolteachers and students can report a landslide event by pointing it in the reporting

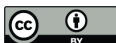

114 system. In this frame, the ability of schools for organising monthly meetings with the teachers and students  
115 regarding collecting information of any landslide event occurred in nearby areas was assessed.  
116 For the identification of stakeholders for the NELIS, a questionnaire survey was carried out, and organisations  
117 dealing with landslide management were visited. The questionnaire was conducted with 40 officers from  
118 different governmental organisations in Nepal. Information related to their position in the organisation and how  
119 they could contribute to the national landslide information system was gathered. Considering the questionnaire  
120 survey, we collected information about user needs and requirements towards a landslide information system and  
121 functionalities that should be prioritised when setting up the system.  
122 It is crucial to understand the administrative, organisational structure of Nepal before carrying out stakeholder's  
123 analysis. In Nepal, the lowest administrative unit is  which is administered by the district office at the  
124 district level. All district level officers are governed by national departments which are headed by various  
125 ministries. All ministries are governed under the central government (see Figure.1).

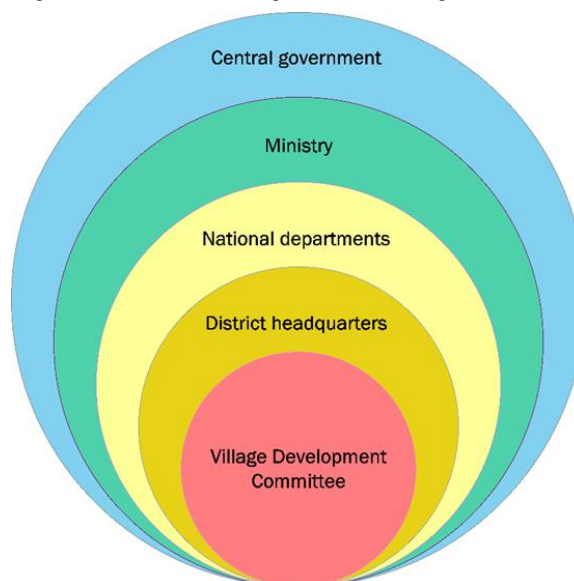

126  
127 **Figure. 1 Administrative, the organisational structure in Nepal.**

128  
129 There are three main components of NELIS, stakeholder overview, landslide reporting, and data sources for  
130 inventory generation. In the stakeholder overview, the potential users and data providers of the system are  
131 discussed. Then the potential landslide reporting stakeholders and methods are discussed with possible data  
132 sources for landslide inventory generation. After gathering user information and data sources, the final  
133 conceptual structure of NELIS is proposed (see Figure.2).

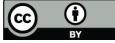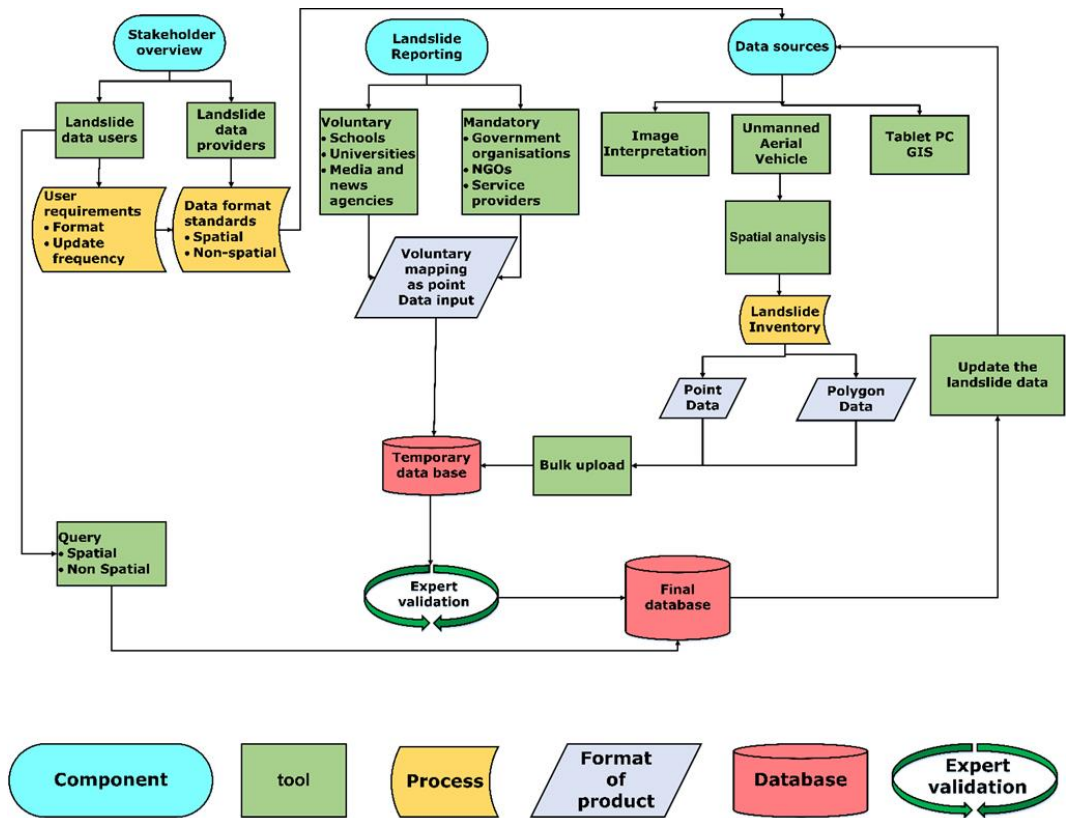

134  
 135 Figure. 2 The flowchart of the conceptual framework.

136 **3 Results**

137  
 138 **3.1 Stakeholder overview and status of landslide management in Nepal**

139 The first step for setting up the NELIS is to investigate the administrative and organisational structure in Nepal,  
 140 along with the information that could be collected and disseminated. The smallest administrative unit in Nepal is  
 141 the Village Development Committee (VDC) which is headed by the VDC head. At the district level, there is a  
 142 district headquarter which manages various administrative departments. Knowledge of the structure of the  
 143 administrative organisations leads to a better understanding of the stakeholder distribution at the different  
 144 organisational levels.

145 During the interviews and open questionnaire survey, several suggestions and requirements of the various  
 146 stakeholders were identified, as well as additional organisations that are working in landslide research and  
 147 mitigation. The evaluation of the stakeholder’s roles and requirements for the NELIS showed that many  
 148 suggestions resulted from the questionnaire survey for the development of the NELIS. The results of the survey  
 149 were analysed; Figure. 3 shows the components of the NELIS that needs to be prioritised during development.  
 150 Four components are of most importance, a reporting system (18 %), the collection of new data from various  
 151 sources after an event (23.08 %), updating of already existing datasets (32.98 %), and development of new



152 guidelines for a mapping workflow (26.37 %). Results show that most of mapping or data collection work has  
153 been carried out after the Gorkha event, but that hardly any updates of the datasets were made afterwards. It also  
154 became evident that landslide inventory data are not available to the public, and it is difficult to get permissions  
155 from authors to share the data to external scientists or organisations.  
156

### Questionnaire Results

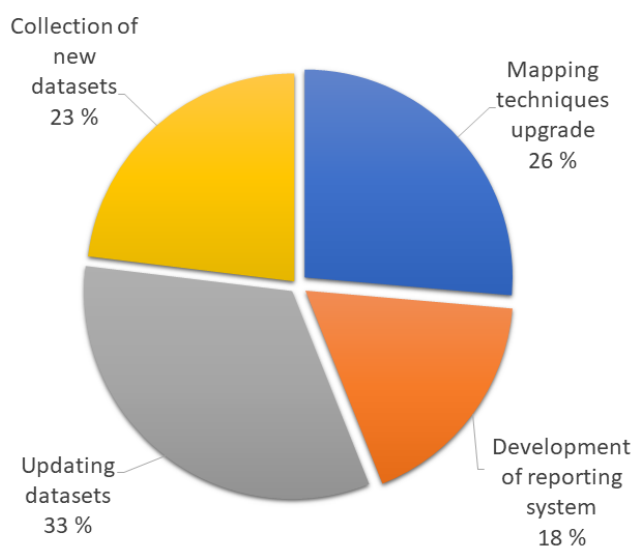

157  
158 **Figure. 3 Results of the questionnaire showing the components that should be prioritised in the development of the**  
159 **NELIS.**

160  
161 In Nepal, a wide range of stakeholders are active in landslide management. Stakeholders involved in landslide  
162 related work such as the rural road development department, land management authorities, forest department,  
163 disaster management department and the Nepalese army. Some agencies are dealing with land degradation, soil  
164 erosion, a different type of landslides, such as the **DSCWM, DMG and the DWIDM**, they can be considered as  
165 the potential nodal agencies for the development of the NELIS. Other organisations like the Department of  
166 Hydrology and Meteorology and ICIMOD have the technical expertise and workforce that is necessary for the  
167 development of the proposed system. Some of the mentioned organisations already have landslide inventories  
168 and socio-economic data for most of the districts, but the information is often only in the form of reports. The  
169 collaboration between these organisations and transferring the data into geocoded landslide information at the  
170 national scale can lead to improved spatial planning in landslide-prone areas. There are maintenance reports by  
171 rural road department offices available, which were created after road blockages. DSCWM has prepared a



172 landslide inventory, but landslide data is compiled into reports, and there is no geocoded information about the  
173 landslides.

174 After visiting a range of organisations (governmental organisations, NGOs, INGOs) during the field visit, a list  
175 of main stakeholders as users of the system was compiled (Table 1). Moreover, potential data providers and  
176 their contribution to a landslide information system in Nepal and were identified. The organisations can be  
177 grouped into several categories, such as national organisations, international research groups, academia, and  
178 news and media. Table 1 lists the main actors and describes their tasks for landslide management. NELIS  
179 supports in landslide data collection and landslide management in their efforts to report and provide landslide  
180 information.

181

182 **Table 1 Presentation of the stakeholder overview and their contribution to the NELIS.**

|    | Organisation                                                     | Contribution                                                                                                                                                                                                                                                                                                                                                               |
|----|------------------------------------------------------------------|----------------------------------------------------------------------------------------------------------------------------------------------------------------------------------------------------------------------------------------------------------------------------------------------------------------------------------------------------------------------------|
| 1. | Academic and research institutes                                 | <ul style="list-style-type: none"><li>• They can provide landslide inventory data prepared by them.</li><li>• Analogue reports and also digital landslide inventories prepared for research purposes (Gnyawali et al., 2016).</li></ul>                                                                                                                                    |
| 2. | News and Media                                                   | <ul style="list-style-type: none"><li>• The news and media agencies can provide the geocoded location of the event to the system.</li><li>• Getting information about landslides by searching newspaper archives (Taylor et al., 2015).</li></ul>                                                                                                                          |
| 3. | Department of Soil Conservation and Watershed Management (DSCWM) | <ul style="list-style-type: none"><li>• DSCWM has landslide information at the regional and local level.</li><li>• They maintain a landslide database in their department.</li><li>• DSCWM has prepared guidelines to map landslides.</li></ul>                                                                                                                            |
| 4. | Department of Mines and Geology (DMG)                            | <ul style="list-style-type: none"><li>• Development of landslide inventory at the local level.</li><li>• Can provide regional landslide inventories.</li></ul>                                                                                                                                                                                                             |
| 5. | Rural Roads and Construction Authority (RRCA)                    | <ul style="list-style-type: none"><li>• Maintain analogue database in the form of registers and know about landslides in the countryside; they get information from local people during road clearance.</li><li>• Maintenance reports after a landslide blocked a road.</li><li>• They can provide road clearance reports that will help to identify landslides.</li></ul> |
| 6. | Department of water-induced disaster management (DWIDM)          | <ul style="list-style-type: none"><li>• Mitigation works for landslide hazard prevention.</li><li>• Landslide prevention by constructing gabion walls and similar preventive measures.</li></ul>                                                                                                                                                                           |
| 7. | Department of Hydrology and Meteorology                          | <ul style="list-style-type: none"><li>• Provide landslide induced dams data.</li></ul>                                                                                                                                                                                                                                                                                     |





- |     |                                               |   |                                                           |
|-----|-----------------------------------------------|---|-----------------------------------------------------------|
| 8.  | Village Development Committee (VDC)           | • | Help in providing local ground data about recent hazards. |
| 9.  | UNDP (Foreign organisations working in Nepal) | • | Financial and workforce support.                          |
| 10. | UNEP (Foreign organisation working in Nepal)  | • | Financial and human resources support.                    |

183 **3.2 Available landslide inventories**

184 After the Gorkha earthquake in 2015, several attempts were made to carry out landslide inventory mapping for  
 185 the affected area of about 10,000 km<sup>2</sup> located in Nepal and China (Gnyawali et al., 2016; Goda et al., 2015;  
 186 Kargel et al., 2016; Martha et al., 2017; Roback et al., 2018; Robinson et al., 2017; Shrestha et al., 2016;  
 187 Valagussa et al., 2016). Table 2 lists the landslide inventories created for Nepal. There is a variation in the  
 188 number of landslides for the same event. Some of the inventories were accessed through the online portal of  
 189 earthquake response (HDX, 2015), and for the pre-earthquake inventories, authors were contacted for the data.  
 190 Most inventories are polygon-based, hence enable the statistical analysis of area distribution for hazard analysis  
 191 (Malamud et al., 2004). Other inventories are the point-based, compiled just after the earthquake by ICIMOD  
 192 (Gurung and Maharjan, 2015) and the British Geological Survey (BGS).

193 There were several attempts made to map landslides by teams from the University of Arizona, Tucson, AZ,  
 194 USA (Kargel et al., 2016); NASA-USGS earthquake response team (Roback et al., 2018); Chinese Academy of  
 195 Sciences (Zhang et al., 2016). A total of 19,332 landslides were mapped by (Gnyawali et al., 2016) using  
 196 Google Earth imagery. Researchers from the Indian Space Research Organisation (ISRO) (Martha et al., 2017)  
 197 mapped a total of 15,551 landslides using object-oriented image classification. (Valagussa et al., 2016) mapped  
 198 a total of 4,300 co-seismic landslides using Google Earth satellite images; it is lesser than other studies as they  
 199 did not consider whole affected districts while mapping. Recently, a landslide inventory related to the Gorkha  
 200 earthquake was created by (Roback et al., 2018), mapping 24,915 landslides, which covered most of the area  
 201 affected by the earthquake. The large quantity of identified landslides is the result of using very high-resolution  
 202 WorldView/GeoEye satellite imagery for the mapping. They also differentiated source area and body of the  
 203 landslides, which makes it distinct from other inventories. There are three rainfall-induced landslide inventories  
 204 collected during fieldwork. Pre-earthquake landslides were mapped by (Zhang et al., 2016) and by (Pokharel  
 205 and Bhujju, 2015).

206  
 207 **Table 2 Current status of landslide inventories in Nepal.**

| Landslide inventory              | No. of landslides | Geometry type | Area coverage  | Produced by                 |
|----------------------------------|-------------------|---------------|----------------|-----------------------------|
| Tribhuvan University             | 5003              | Point         | Nepal          | (Pokharel and Bhujju, 2015) |
| ICIMOD<br>Koshi River Basin 1992 | 3559              | Polygon       | Koshi<br>Basin | (Zhang et al., 2016)        |





|                                              |       |         |                   |                             |
|----------------------------------------------|-------|---------|-------------------|-----------------------------|
| ICIMOD<br>Koshi River Basin 2010             | 3398  | Polygon | Koshi River Basin | (Zhang et al., 2016)        |
| Valagussa et al. 2016                        | 4300  | Polygon | Central Nepal     | (Valagussa et al., 2016)    |
| ICIMOD                                       | 5159  | Polygon | Central Nepal     | (Gurung and Maharjan, 2015) |
| USGS                                         | 24915 | Polygon | Central Nepal     | (Roback et al., 2018)       |
| Indian Space Research<br>Organisation (ISRO) | 15551 | Polygon | Central Nepal     | (Martha et al., 2017)       |
| Chinese Academy of<br>sciences               | 2645  | Polygon | Central Nepal     | (Zhang et al. 2016)         |
| ITC, University of Twente                    | 2513  | Polygon | Central Nepal     | (Meena et al., 2018)        |
| The University of Arizona,<br>Tucson, USA    | 4312  | Polygon | Central Nepal     | (Kargel et al. 2016)        |
| Gnyawali and Adhikari 2016                   | 19332 | Point   | Central Nepal     | (Gnyawali et al., 2016)     |

### 208 3.3 User needs and requirements

209 For better addressing, the user needs the conceptual design of the NELIS includes four pillars: concept  
210 definition, user requirements assessment, **EO database** and database structure for the NELIS(see Figure.4)  
211 (Hölbling, 2017). The needs and requirements of stakeholders working on landslide management are identified,  
212 and the type of landslide and the format are already available for them. For example, news and media can  
213 provide information related to significant size landslide events, which caused fatalities or infrastructural  
214 damage. Government departments can supply different kinds of landslide datasets based on their work, like the  
215 DSCWM who has field-based landslide inventories for small watersheds in Nepal. They could transfer all their  
216 data to digital format as in DSCWM they use a GIS platform to map landslides. Also, DMG has several  
217 geological hazard assessment reports that were produced after the earthquake based on field investigations,  
218 which should be included in the NELIS.

219 Based on the questionnaire survey, following user needs and requirements for the development of the NELIS are  
220 compiled:

- 221 i. Some of the organisations have already done data collection and reporting at a large scale, but there is a lack  
222 of transferring this knowledge into preparing hazard maps for mitigation works.
- 223 ii. There is a need for harmonised guidelines for mapping landslides. Mapping guidelines are already existing at  
224 DSCWM but based on a questionnaire survey; these guidelines need to be improved.
- 225 iii. Landslides are dynamic processes, and thus landslide databases require updating of datasets after each  
226 monsoon season at least once a year.
- 227 iv. The use of remote sensing data is not enough; field verification should be carried out in addition.
- 228 v. Universities and academia can contribute to reporting and information sharing of research work in landslide  
229 hazards that will help in methodological advancement.
- 230 vi. There is a need for transparency and exchange of information to mitigate the effects of landslides.

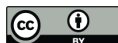

- 231 vii. Users can switch between different GIS layers such as land use, settlements, geology, and should be able to  
232 retrieve the requested information quickly.
- 233 viii. Coordination between organisations is necessary to avoid duplicate efforts.
- 234
- 235 Requirements and suggestions can be included in the development of the system; the technical, as well as  
236 management limitations at the national level, should be considered. Thus, after analysing the user requirements  
237 and the contribution of landslide data, a conceptual structure of the NELIS is proposed.
- 238

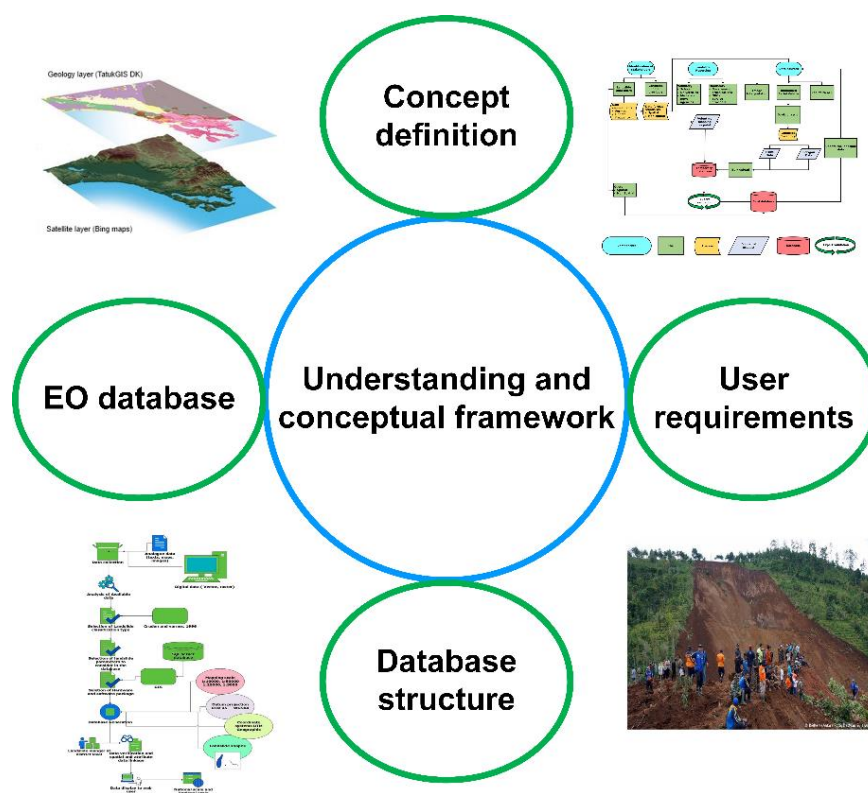

239

240 **Figure.4: Understanding and conceptual framework for the development of NELIS. Adopted from (Höbling, 2017).**

### 241 3.4 The targeted landslide data sources for NELIS

242 **For the development of comprehensive landslide database identification of sources of the landslide, the input is**  
243 **important.** Based on the literature review and available landslide information in Nepal, we found some of the  
244 possible sources of landslide data input. There are several sources of landslide data in Nepal such as historical  
245 documents, news and media archives, past development projects and technical data. In this section, we also  
246 discussed the data attributes and corresponding metadata format of entering landslide data in the NELIS.



247 **3.4.1 Historical documents, news and media archives**

248 Newspaper and media report archives are one of the crucial sources of landslide information all over the world.  
 249 An example is the global landslide database by The National Aeronautics and Space Administration (NASA),  
 250 which is based on news reports (Kirschbaum et al., 2010). News articles may be the first way by which people  
 251 hear about a hazard. In Nepal, landslides that occur near the road network or near the built-up area are  
 252 sometimes covered by the newspaper and media agencies. Newspaper archives can give information about the  
 253 damage caused by a landslide and the most probable landslide location near to a locality or village. Sometimes,  
 254 photos of the event shown in newspapers can provide information on the spatial extent of the landslide. In  
 255 today's digital era, some newspapers in Nepal are also available online, which enables readers to find news from  
 256 the past. Newspapers like The Himalayan Times, the most popular newspaper in Nepal, sometimes cover stories  
 257 about landslides that affect the populated area or block rivers.  
 258

259 **3.4.2 Landslide inventory maps as part of development projects**

260 The primary purpose of this section is to provide indications for the use of techniques for collecting data for  
 261 NELIS. Landslide mapping is performed for reporting and showing the distribution and spatial extent of the  
 262 landslide occurrence from local level VDC to large watersheds, and from regional to national level. Despite the  
 263 significance of landslide inventories and the way that landslide maps have been prepared for a long time, there  
 264 are no clear guidelines for the creation of landslide maps and the assessment of their quality in Nepal. Sources  
 265 of landslide information vary in Nepal as various organisations are working in the field of landslides, and most  
 266 of the information is in analogue format in the form of reports. The selection of a specific mapping technique  
 267 depends upon the purpose and the extent of the study area. There are other criteria for selection of mapping  
 268 techniques discussed by (Guzzetti et al., 2012) like mapping scale, the spatial resolution of the available satellite  
 269 imagery and most importantly the skills and resources available for completing the task (Guzzetti, 2000;  
 270 Guzzetti et al., 2012; Van Westen et al., 2006).

271 **3.4.3 Technical reports**

272 Different technical reports are available which were collected during fieldwork by several organisations. After  
 273 the Gorkha earthquake, initial assessment of earthquake affected settlements was carried out by DMG and  
 274 DSCWM, DWIDM and Tribhuvan University. An example of a technical report collected by DSCWM is shown  
 275 in Table 3. The information related to the occurrence of a landslide, its dimensions, damage caused, impacted  
 276 area and also sketch map are compiled in a table within the report.  
 277

278 **Table 3. Landslide Mapping Information sheet (DSCWM, 2016)**

|                               |              |                    |               |
|-------------------------------|--------------|--------------------|---------------|
| District: Rasuwa              | VDC: Yarsa   | Ward: 09<br>Ghormu | Village/Tole: |
| 1. Dimension of<br>Landslide: | Length: 200m | Width: 20m         |               |
| 2. Position on Hill:          | Middle       |                    |               |



|    |                                   |                                                                                                                                         |                   |                  |
|----|-----------------------------------|-----------------------------------------------------------------------------------------------------------------------------------------|-------------------|------------------|
| 3. | Land Crakes                       | Length                                                                                                                                  | Width             |                  |
| 4. | Impacted area:                    | 2000m2                                                                                                                                  |                   |                  |
| 5. | Possible impact area:             | 500m2                                                                                                                                   |                   |                  |
| 6. | Property in possible impact area: | a. Farmland: Ropani<br>b. Settlement:<br>c. Road: 10m Goreto bato<br>d. Irrigation canal<br>e. Other property: Water supply, water mill |                   |                  |
| 7. | GPS points:                       | Longitude: 0623293                                                                                                                      | Latitude: 3100224 | Elevation: 1748m |
| 8. | Sketch map of Landslide           |                                                                                                                                         |                   |                  |
|    |                                   |                                                                                                                                         |                   |                  |
| 9. | Information collected by:         | Name of the person                                                                                                                      |                   |                  |

279

280 **3.4.4 An instance of landslide attributes and their corresponding metadata**

281 Landslide features can be stored as a single feature with a point representing the landslide location. A landslide  
 282 ID can be assigned to an individual landslide with associated attributes like the date of the event, the resulting  
 283 damage, the people affected, and the landslide type, if such information is available. Illustration of landslide ID  
 284 linkage to the associated feature is shown in Figure. 5, where landslide polygons were obtained from the  
 285 existing landslide inventory by (Roback et al., 2018). There can be variation among different datasets regarding  
 286 their attributes. Based on expert opinion and literature, a set of the essential attributes needs to be defined and to  
 287 be used as a specification for a new landslide database. Hence, not all the data from the primary databases will  
 288 be transferred to the new database.

289 Landslide attributes and the type of information can be taken from Varnes classification (Varnes, 1978). There  
 290 is a list of attributes proposed by (Huang et al., 2013), primary attributes are landslide location, date and time of  
 291 the event, type of landslide, and secondary attributes like triggering factors, damage. However, information for  
 292 some of the identified attributes probably lacks because of data scarcity in Nepal. Based on local Nepalese  
 293 situation and data availability, we presented a simple illustration of the linkage of spatial and metadata attributes  
 294 to a single landslide polygon (see Figure. 5).

295

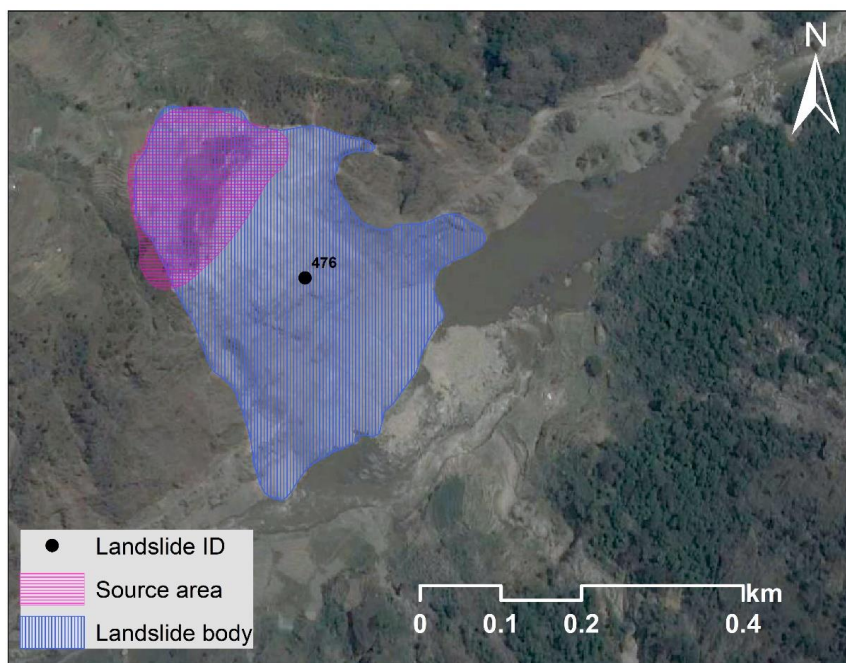

296

297

298 **Figure 5:** Example of landslide polygon from an existing landslide inventory (Roback et al., 2018). A common  
299 landslide ID links the two polygon features.

### 300 3.5 Landslide reporting to NELIS

301 The communities can directly report landslides into the system. NELIS will provide the users with an  
302 opportunity to participate in the mapping process by pointing out a landslide on the web-based  
303 platform. After reporting, the information will be stored in a temporary database. There could be false  
304 information entered by non-experts so that landslide expert should check the data at the district level.  
305 At every district headquarter there is a landslide expert from DSCWM, and this expert can be the  
306 responsible person for validating the public reported landslides.

307 Governmental organisations like DSCWM, DMG and DWIDM, are the key organisations who work  
308 in the landslide management. After the development of the NELIS officers from organisations should  
309 be given training regarding the use of the system and also the management of the information from  
310 different sources. Experts can also transfer bulk data directly to the system, both point and polygon  
311 data (see Figure. 6).

312

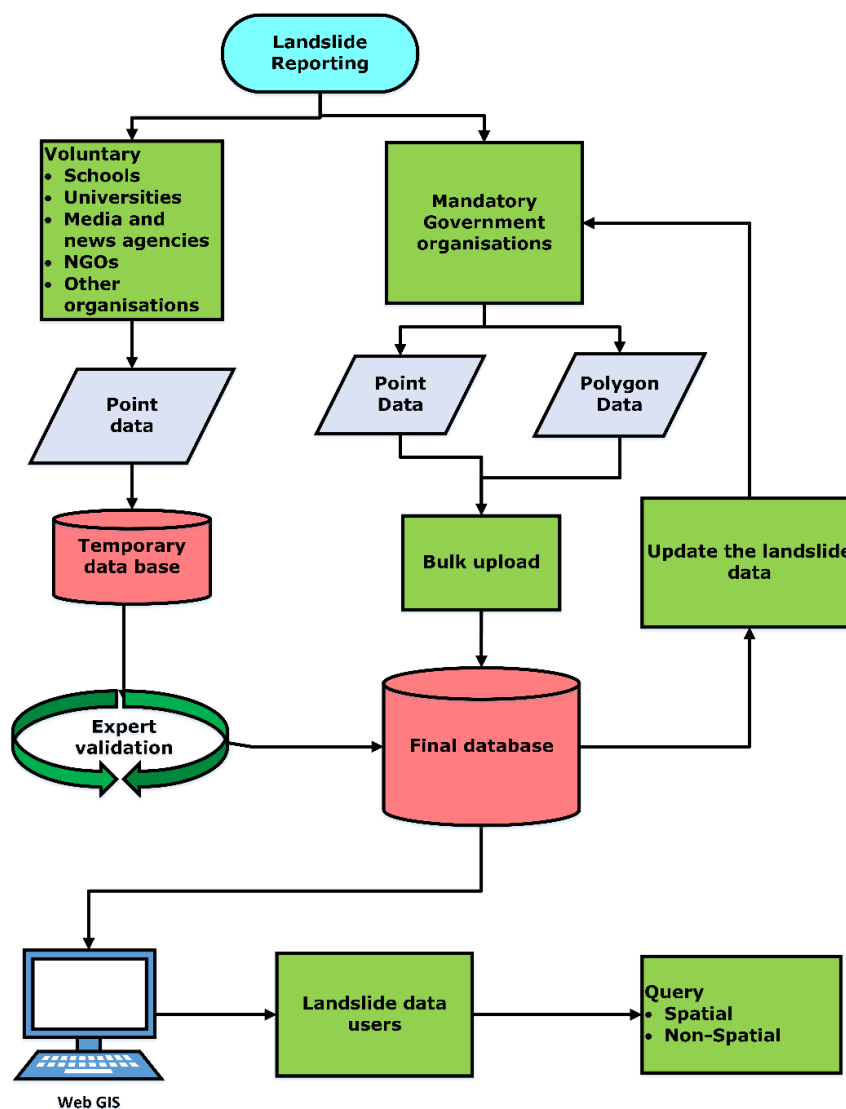

313

314 Figure. 6 The workflow of landslide reporting is presented.

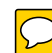

315 **3.6 The database structure of the web-based Nepalese landslide information system (NELIS)**

316 The main aim of this section is to conceptualise a web-based information system that allows stored  
 317 landslide data to be easily accessible, displayed and queried and to add new information. The existing  
 318 landslide datasets from different sources have various structures and types, making it challenging to  
 319 transfer and compare the data. Therefore, a unified data model for landslide storage is needed.  
 320 However, datasets can be from different sources and at variable scales and accuracy levels. It is very  
 321 challenging to transfer data from different sources, so there is a need for harmonising existing



322 datasets such as the development of guidelines for data provision following a defined structure. The  
323 NELIS is proposed to have a series of views and tables in a relational spatial database. Location and  
324 shape of landslides represent the spatial information. The database should be designed to store  
325 landslide information as polygon and point features and also information related to the projection  
326 system. There is a need to transfer landslide information from technical reports to topographic maps  
327 by experts with geocoded information and then upload to the NELIS. So, experts who are working in  
328 landslide data management can take the initiative to transfer the analogue data from reports to  
329 geocoded information.

330 The web service platform can be implemented as a spatial relational database and can be hosted,  
331 developed and maintained by a nodal agency in Nepal. The web interface comprises of tools for  
332 displaying and searching landslide information in the form of maps and tables. The web service can  
333 allow and display the information to the user to interact with the map layers (Rosser et al., 2017). An  
334 advantage of the proposed concept for NELIS is that it is exclusively based on Opensource software.

335 The ~~object-relational~~ database management system (DBMS) will be based on PostgreSQL Query  
336 Language, providing all functions of SQL as a database language for a generation and manipulation  
337 of stored data and data queries. To process and store spatial data, PostGIS can be integrated as an  
338 extension for PostgreSQL. PostGIS not only improves the storage of GIS information in the DBMS but  
339 also offers spatial operations, spatial functions, spatial data types, as well as a spatial indexing  
340 enhancement (Obe and Hsu, 2011).

341 The first and foremost step is data collection from analogue reports and already available digital data.  
342 Then transfer the data to vector or raster layers for further analysis by experts (see Figure. 7). After  
343 that, the available landslide data can be classified into different landslide types (Crudden 1996). In the  
344 next step, data is stored in a database with keeping the shapes of landslides, projection of maps.  
345 Furthermore, a landslide manager can verify the landslides in their respective areas, and after the  
346 final check, data can be uploaded to the web-based system to be available online.

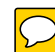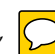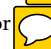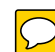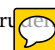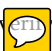



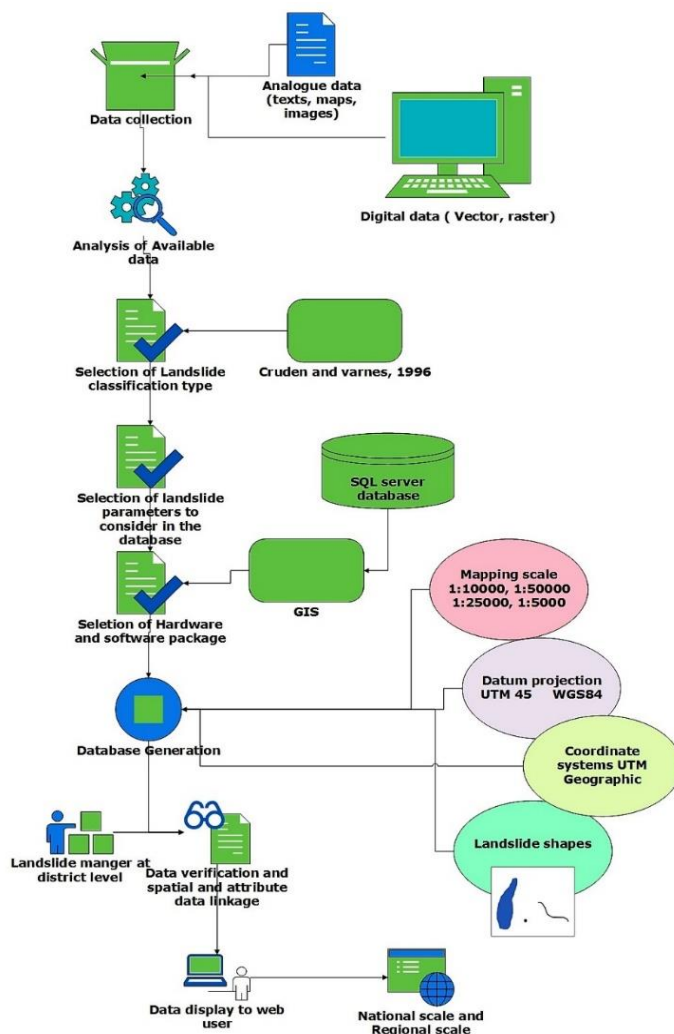

347

348

Figure. 7 The architecture of the proposed structure for the NELIS; adapted from (Devoli et al.,

349

2007)

#### 350 4 Discussion and Conclusion

351 The development of the Nepalese landslide information system (NELIS) to report and arrange landslide data  
352 will facilitate better data sharing among stakeholders and will provide a platform for future risk mitigation  
353 efforts. Any produced landslide inventory cannot be fully complete or entirely accurate; also, just because a  
354 landslide is not recorded, this does not mean a landslide has not occurred. The quality of the data in the NELIS  
355 will be dependent on the completeness of data recorded in the source database. Many landslide records only  
356 store location data, with no information about the boundary, area, the date of movement, type of landslide, or



357 triggering event. In contrast, there are some landslides like the Jure landslide in Nepal, that have been the  
358 subject of intense research with detailed information (Acharya et al., 2016).  
359 One of the limitations of the data to be joined into the landslide database is the inconsistency of the spatial  
360 correctness of landslide features, which is depended on the method of mapping. Generally, landslide polygons  
361 that are delineated from high-resolution satellite imageries are accurate at the scale at which they are delineated.  
362 Landslide point location accuracy is highly variable and ranges from sub-meter precision measured by GPS  
363 devices.  
364 There can also be landslides in the database that have been mapped using different techniques such as field  
365 study based detailed inventories or semi-automatically generated inventories, which leads to some limitations.  
366 Landslide datasets often contain point data, generally located in the center of the landslide, whereas large  
367 datasets of polygons such as inventory produced by (Roback et al., 2018) which consists of around 24000  
368 landslides after the Gorkha earthquake, including two different types of information of the source and deposition  
369 areas of the landslides. There are some solutions but not cover all the limitations such as sub-areas of a single  
370 landslide can be linked in the database by the landslide ID. Storing all mapped landslides in a single database  
371 has the advantage of allowing better characterisation of landslides such as for identifying landslides related to a  
372 particular rainfall or earthquake event in a particular area (Rosser et al., 2017). Comprehensive information  
373 about the spatial and temporal distribution of landslides allows also establishing links to the triggering  
374 mechanisms and to estimate the damage and impact caused by a landslide. This information is useful for land-  
375 use planners and policymakers for managing of landslide hazard and its associated environmental impacts.  
376 The conceptual framework presented in this paper shows for the first time the available information in Nepal  
377 related to landslide hazard and allows us to characterise the landslide stakeholders involved. The framework  
378 also allows for detailed investigation of the design, and structure and helps us to identify the organisations  
379 working on landslides in Nepal. In the future study, the conceptual framework presented in this paper can be  
380 extended to the development of the National scale landslide management system for Nepal. The system can be  
381 beneficial for specifying the potential risky regions and consequently, the development of risk mitigation  
382 strategies at the local level.

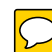

### 383 Acknowledgements

384 This study has been partly funded by the Austrian Science Fund (FWF) through the GIScience Doctoral College  
385 (DK W 1237-N23). Daniel Hölbling has been supported by the Austrian Academy of Sciences (ÖAW) through  
386 the project RiCoLa (Detection and analysis of landslide-induced river course changes and lake formation).  
387 Florian Albrecht has been supported by the Austrian Research Promotion Agency (FFG) through the project  
388 Land@Slide (EO-based landslide mapping: from methodological developments to automated web-based  
389 information delivery).

### 391 References

392 Acharya, T., Mainali, S., Yang, I., and Lee, D.: Analysis of Jure landslide dam, Sindhupalchowk using  
393 GIS and remote sensing, The International Archives of Photogrammetry, Remote Sensing and Spatial  
394 Information Sciences, 41, 201, 2016.

395 Aniel-Quiroga, Í., Álvarez-Gómez, J., González, M., Aguirre Ayerbe, I., Fernández Pérez, F., Jara, M.,  
396 González-Riancho, P., Medina, R., Al-Harthy, S., and Al-Yahyai, S.: Tsunami Hazard assessment and  
397 Scenarios Database development for the Tsunami Warning System for the coast of Oman, 2015.

398 BRGM: <http://www.brgm.eu/>, 2018

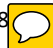



- 399 Carr, J. A.: Pre-disaster integration of community emergency response teams within local emergency  
400 management systems, North Dakota State University, 2014.
- 401 Chen, W., He, B., Zhang, L., and Nover, D.: Developing an integrated 2D and 3D WebGIS-based  
402 platform for effective landslide hazard management, *International Journal of Disaster Risk*  
403 *Reduction*, 20, 26-38, 2016.
- 404 Chendes, V., Balteanu, D., Micu, D., Sima, M., Ion, B., Grigorescu, I., Persu, M., and Dragota, C.: A  
405 database design of major past flood events in Romania from national and international inventories,  
406 *Aerul si Apa. Componente ale Mediului*, 2015. 25, 2015.
- 407 Cheng, D., Cui, Y., Su, F., Jia, Y., and Choi, C. E.: The characteristics of the Mocoa compound disaster  
408 event, *Colombia, Landslides*, 15, 1223-1232, 2018.
- 409 Corominas, J., van Westen, C., Frattini, P., Cascini, L., Malet, J.-P., Fotopoulou, S., Catani, F., Van Den  
410 Eeckhaut, M., Mavrouli, O., Agliardi, F., Pitolakis, K., Winter, M. G., Pastor, M., Ferlisi, S., Tofani, V.,  
411 Hervás, J., and Smith, J. T.: Recommendations for the quantitative analysis of landslide risk, *Bulletin*  
412 *of Engineering Geology and the Environment*, 73, 209-263, 2014.
- 413 CRED, C. f. R. o. t. E. o. D.-. <http://www.emdat.be/about>, 2018.
- 414 Cruden, D. M. V. D. J.: Cruden, D.M., Varnes, D.J., 1996, *Landslide Types and Processes*, Special  
415 Report, Transportation Research Board, National Academy of Sciences, 247:36-75, Special Report -  
416 National Research Council, Transportation Research Board, 247, 76-76, 1996.
- 417 De Donatis, M. and Brucciatelli, L.: MAP IT: The GIS software for field mapping with tablet pc,  
418 *Computers and Geosciences*, 32, 673-680, 2006.
- 419 Devkota, S., Sudmeier-Rieux, K., Penna, I., Erble, S., Jaboyedoff, M., Andhikari, A., and Khanal, R.:  
420 *Community-Based Bio-Engineering for Eco-Safe Roadsides in Nepal*, 2014. 2014.
- 421 Devoli, G., Strauch, W., Chávez, G., and Høeg, K.: A landslide database for Nicaragua: a tool for  
422 landslide-hazard management, *Landslides*, 4, 163-176, 2007.
- 423 DSCWM: *Landslide Area Mapping of Lower Phalakhu Khola Sub-watershed of Rasuwa District*.  
424 District Soil Conservation Office, R. (Ed.), 2016.
- 425 Feizizadeh, B., Roodposhti, M. S., Jankowski, P., and Blaschke, T.: A GIS-based extended fuzzy multi-  
426 criteria evaluation for landslide susceptibility mapping, *Computers & geosciences*, 73, 208-221, 2014.
- 427 Ghorbanzadeh, O., Blaschke, T., Gholamnia, K., Meena, S. R., Tiede, D., and Aryal, J.: Evaluation of  
428 Different Machine Learning Methods and Deep-Learning Convolutional Neural Networks for  
429 Landslide Detection, *Remote Sensing*, 11, 196, 2019.
- 430 Gnyawali, K. R., Maka, S., Adhikari, B. R., Chamlagain, D., Duwal, S., and Dhungana, A. R.: **Spatial**  
431 **implications of earthquake induced landslides triggered by the April 25 Gorkha earthquake Mw 7.8:**  
432 **preliminary analysis and findings, 2016, 50-51**
- 433 Goda, K., Kiyota, T., Pokhrel, R. M., Chiaro, G., Katagiri, T., Sharma, K., and Wilkinson, S.: The 2015  
434 Gorkha Nepal earthquake: insights from earthquake damage survey, *Frontiers in Built Environment*,  
435 1, 8, 2015.
- 436 Gurung, D. R. and Maharjan, S. B.: *Post Nepal Earthquake Landslide Inventory*, 28-29 pp., 2015.
- 437 Guzzetti, F.: Landslide fatalities and the evaluation of landslide risk in Italy, *Engineering Geology*, 58,  
438 89-107, 2000.
- 439 Guzzetti, F., Cardinali, M., and Reichenbach, P.: The AVI project: A bibliographical and archive  
440 inventory of landslides and floods in Italy, *Environmental Management*, 18, 623-633, 1994.
- 441 Guzzetti, F., Mondini, A. C., Cardinali, M., Fiorucci, F., Santangelo, M., and Chang, K.-T.: Landslide  
442 inventory maps: New tools for an old problem, *Earth-Science Reviews*, 112, 42-66, 2012.
- 443 HDX: <https://data.humdata.org/group/nepal-earthquake>, 2015.
- 444 Herrera, G., Mateos, R. M., García-Davalillo, J. C., Grandjean, G., Poyiadji, E., Maftai, R., Filipciuc, T.-  
445 C., Jemec Auflič, M., Jež, J., Podolszki, L., Trigila, A., Iadanza, C., Raetzo, H., Kociu, A., Przyłucka, M.,  
446 Kułak, M., Sheehy, M., Pellicer, X. M., McKeown, C., Ryan, G., Kopačková, V., Frei, M., Kuhn, D.,  
447 Hermanns, R. L., Koulermou, N., Smith, C. A., Engdahl, M., Buxó, P., Gonzalez, M., Dashwood, C.,  
448 Reeves, H., Cigna, F., Liščák, P., Pauditš, P., Mikulénas, V., Demir, V., Raha, M., Quental, L., Sandić, C.,



- 449 Fusi, B., and Jensen, O. A.: Landslide databases in the Geological Surveys of Europe, *Landslides*, 15,  
450 359-379, 2018.
- 451 Hölbling, D., Füreder, P., Antolini, F., Cigna, F., Casagli, N., and Lang, S.: A Semi-Automated Object-  
452 Based Approach for Landslide Detection Validated by Persistent Scatterer Interferometry Measures  
453 and Landslide Inventories, *Remote Sensing*, 4, 1310-1336, 2012.
- 454 Hölbling, D., Weinke, E., Albrecht, F., Eisank, C., Vecchiotti, F., Friedl, B., Osberger, A., Kociu, A.: A  
455 web service for landslide mapping based on Earth Observation data, 3rd Regional symposium on  
456 Landslides in the Adriatic-Balkan Region (ReSyLAB), Ljubljana, Slovenia, 2017.
- 457 Huang, R., Huang, J., Ju, N., He, C., and Li, W.: WebGIS-based information management system for  
458 landslides triggered by Wenchuan earthquake, *Natural hazards*, 65, 1507-1517, 2013.
- 459 Jaiswal, P. and van Westen, C. J.: Use of quantitative landslide hazard and risk information for local  
460 disaster risk reduction along a transportation corridor: A case study from Nilgiri district, India,  
461 *Natural Hazards*, 65, 887-913, 2013.
- 462 Kargel, J., Leonard, G., Shugar, D. H., Haritashya, U., Bevington, A., Fielding, E., Fujita, K., Geertsema,  
463 M., Miles, E., and Steiner, J.: Geomorphic and geologic controls of geohazards induced by Nepal's  
464 2015 Gorkha earthquake, *Science*, 351, aac8353, 2016.
- 465 Kirschbaum, D. B., Adler, R., Hong, Y., Hill, S., and Lerner-Lam, A.: A global landslide catalog for  
466 hazard applications: method, results, and limitations, *Natural Hazards*, 52, 561-575, 2010.
- 467 Klose, M., Gruber, D., Damm, B., and Gerold, G.: Spatial databases and GIS as tools for regional  
468 landslide susceptibility modeling, *Zeitschrift für Geomorphologie*, 58, 1-36, 2014.
- 469 Knoop, P. a. and van der Pluijm, B.: GeoPad: Tablet PC-enabled Field Science Education, *The Impact  
470 of Pen-based Technology on Education: Vignettes, Evaluations, and Future Directions*, 2006. 200-  
471 200, 2006.
- 472 Kumar, R., Hasegawa, S., Nonomura, A., and Yamanaka, M.: Geomorphology Predictive modelling of  
473 rainfall-induced landslide hazard in the Lesser Himalaya of Nepal based on weights-of-evidence,  
474 *Geomorphology*, 102, 496-510, 2008.
- 475 Lazzari, M., Gioia, D., and Anzidei, B.: Landslide inventory of the Basilicata region (Southern Italy),  
476 *Journal of Maps*, 14, 348-356, 2018.
- 477 Malamud, B. D., Turcotte, D. L., Guzzetti, F., and Reichenbach, P.: Landslide inventories and their  
478 statistical properties, *Earth Surface Processes and Landforms*, 29, 687-711, 2004.
- 479 Martha, T. R., Roy, P., Mazumdar, R., Govindharaj, K. B., and Kumar, K. V.: Spatial characteristics of  
480 landslides triggered by the 2015 M w 7.8 (Gorkha) and M w 7.3 (Dolakha) earthquakes in Nepal,  
481 *Landslides*, 14, 697-704, 2017.
- 482 Meena, S. R., Ghorbanzadeh, O., and Blaschke, T.: A Comparative Study of Statistics-Based Landslide  
483 Susceptibility Models: A Case Study of the Region Affected by the Gorkha Earthquake in Nepal, *ISPRS  
484 International Journal of Geo-Information*, 8, 94, 2019a.
- 485 Meena, S. R., Ghorbanzadeh, O., and Hölbling, D.: Comparison of event-based landslide inventories:  
486 a case study from Gorkha earthquake 2015, Nepal, *European Space Agency's 2019 Living Planet  
487 Symposium*, Milan, Italy, 2019b.
- 488 Meena, S. R., Mavrouli, O., and Westen, C. J.: Web based landslide management system for Nepal,  
489 33rd Himalaya-Karakorum-Tibet Workshop (HKT), Lausanne, Switzerland, 10-12 September 2018,  
490 109-110, 2018.
- 491 Meena, S. R., Mishra, B. K., and Tavakkoli Piralilou, S.: A Hybrid Spatial Multi-Criteria Evaluation  
492 Method for Mapping Landslide Susceptible Areas in Kullu Valley, Himalayas, *Geosciences*, 9, 156,  
493 2019c.
- 494 Obe, R. O. and Hsu, L. S.: *PostGIS in Action*, Manning Publications Co., Greenwich, CT, USA, 2011.
- 495 Pennington, C., Freeborough, K., Dashwood, C., Dijkstra, T., and Lawrie, K.: The National Landslide  
496 Database of Great Britain: Acquisition, communication and the role of social media, *Geomorphology*,  
497 249, 44-51, 2015.
- 498 Pokharel, P. and Bhuj: Pre Earthquake Nationwide Landslide Inventory of Nepal 2015 : An Academic  
499 Exercise, 2015.



- 500 Pourghasemi, H. R. and Rahmati, O.: Prediction of the landslide susceptibility: Which algorithm,  
501 which precision?, *Catena*, 162, 177-192, 2018.
- 502 Regmi, A. D., Dhital, M. R., Zhang, J.-q., Su, L.-j., and Chen, X.-q.: Landslide susceptibility assessment  
503 of the region affected by the 25 April 2015 Gorkha earthquake of Nepal, *Journal of Mountain  
504 Science*, 13, 1941-1957, 2016.
- 505 Roback, K., Clark, M. K., West, A. J., Zekkos, D., Li, G., Gallen, S. F., Chamlagain, D., and Godt, J. W.:  
506 The size, distribution, and mobility of landslides caused by the 2015 Mw7. 8 Gorkha earthquake,  
507 Nepal, *Geomorphology*, 301, 121-138, 2018.
- 508 Robinson, T. R., Rosser, N. J., Densmore, A. L., Williams, J. G., Kinsey, M. E., Benjamin, J., and Bell, H.  
509 J.: Rapid post-earthquake modelling of coseismic landsliding intensity and distribution for emergency  
510 response decision support, *Natural hazards and earth system sciences.*, 17, 1521-1540, 2017.
- 511 Rosser, B., Dellow, S., Haubrock, S., and Glassey, P.: New Zealand's national landslide database,  
512 *Landslides*, 14, 1949-1959, 2017.
- 513 Rossi, G., Tanteri, L., Tofani, V., Vannocci, P., Moretti, S., and Casagli, N.: Multitemporal UAV surveys  
514 for landslide mapping and characterization, *Landslides*, doi: 10.1007/s10346-018-0978-0, 2018.  
515
- 516 Shrestha, A. B., Bajracharya, S. R., Kargel, J. S., and Khanal, N. R.: The impact of Nepal's 2015 Gorkha  
517 earthquake-induced geohazards, *International Centre for Integrated Mountain Development  
518 (ICIMOD)*, 2016.
- 519 Suwal, D. and Panday, U. S.: UAV for Post-Disaster Quick Assessment, 661443, 663736-663736, 2015.
- 520 Taylor, F. E., Malamud, B. D., Freeborough, K., and Demeritt, D.: Enriching Great Britain's national  
521 landslide database by searching newspaper archives, *Geomorphology*, 249, 52-68, 2015.
- 522 Tsou, C.-Y., Chigira, M., Higaki, D., Sato, G., Yagi, H., Sato, H. P., Wakai, A., Dangol, V., Amatya, S. C.,  
523 and Yatagai, A.: Topographic and geologic controls on landslides induced by the 2015 Gorkha  
524 earthquake and its aftershocks: an example from the Trishuli Valley, central Nepal, *Landslides*, 2018.  
525 1-13, 2018.
- 526 Valagussa, A., Frattini, P., Crosta, G., and Valbuzzi, E.: Pre and post 2015 Nepal earthquake landslide  
527 inventories. In: *Landslides and Engineered Slopes. Experience, Theory and Practice*, CRC Press, 2016.
- 528 Van Den Eeckhaut, M. and Hervás, J.: State of the art of national landslide databases in Europe and  
529 their potential for assessing landslide susceptibility, hazard and risk, *Geomorphology*, 139-140, 545-  
530 558, 2012.
- 531 Van Westen, C., Van Asch, T. W., and Soeters, R.: Landslide hazard and risk zonation—why is it still so  
532 difficult?, *Bulletin of Engineering geology and the Environment*, 65, 167-184, 2006.
- 533 Varnes, D. J.: Slope Movement Types and Processes, *Transportation Research Board Special Report*,  
534 doi: In Special report 176: Landslides: Analysis and Control, Transportation Research Board,  
535 Washington, D.C., 1978. 11-33, 1978.
- 536 Westen, C. V., Kappes, M. S., Luna, B. Q., Frigerio, S., Glade, T., Malet, J.-p., Greiving, S., Westen, C.  
537 V., Corominas, J., Glade, T., Malet, J.-p., and Asch, T. V.: *Mountain Risks: From Prediction to  
538 Management and Governance*, 2014.
- 539 Xu, C., Xu, X., and Shyu, J. B. H.: Database and spatial distribution of landslides triggered by the  
540 Lushan, China Mw 6.6 earthquake of 20 April 2013, *Geomorphology*, 248, 77-92, 2015.
- 541 Zhang, J. q., Liu, R. k., Deng, W., Khanal, N. R., Gurung, D. R., Murthy, M. S. R., and Wahid, S.:  
542 Characteristics of landslide in Koshi River Basin, Central Himalaya, *Journal of Mountain Science*, 13,  
543 1711-1722, 2016.

544
